# Supplementary material for: Depletion of B220+NK1.1+ cells enhances the rejection of established melanoma by tumor-specific CD4+ T cells
Source: PubMed Central journal article supplement (PMC4570124; doi:10.1080/2162402x.2015.1019196), 2015-04-01

# Supplemental Data 1

A

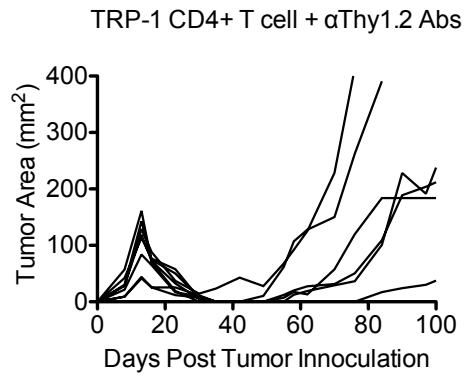

Supplement: koni-04-08-1019196-s001.pdf [file koni-04-08-1019196-s001.pdf]
